# Supplementary material for: Solution-Processed Large-Area Organic/Inorganic Hybrid Antireflective Films for Perovskite Solar Cell
Source: MDPI journal article supplement (doi:10.3390/molecules28052145), 2023-02-24
Supplement: s1 [file s1]

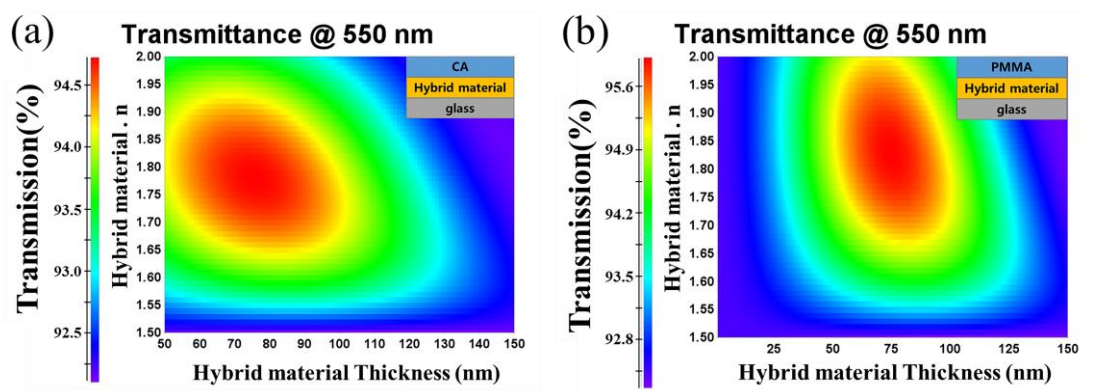

Figure S1 Fitting the optical structure using SetFos, the substrate refractive index is set to  $n_{\text{sub}}=1.5045$ . Chromatograms of the variation of transmittance with refractive index and film thickness of the hybrid material for single-sided bilayer antireflection films ( $10 \times 10 \text{ cm}^2$ ): (a) hybrid material /CA structure; (b) hybrid material /PMMA structure.

Table S1 Effect of viscosity of PT solution of hybrid materials with aging time. (Storage temperature  $5^\circ\text{C}$ , test temperature  $25^\circ\text{C}$ )

| Time (day)                                | 0   | 7    | 14   | 30   | 60   | 90   | 120  | 180  | 240  |
|-------------------------------------------|-----|------|------|------|------|------|------|------|------|
| Viscosity ( $\text{mPa} \cdot \text{s}$ ) | 1.4 | 1.41 | 1.44 | 1.48 | 1.48 | 1.47 | 1.47 | 1.47 | 1.47 |

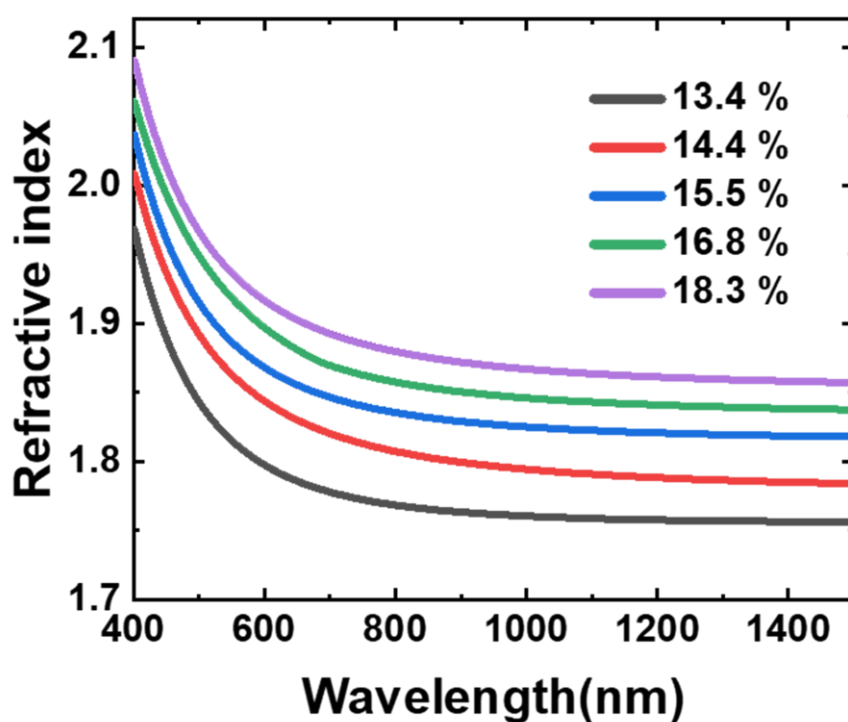

f

Figure S2 Refractive index spectra of different ratios of the hybrid material PT. The films were prepared at room temperature and annealed at  $150^\circ\text{C}$ .

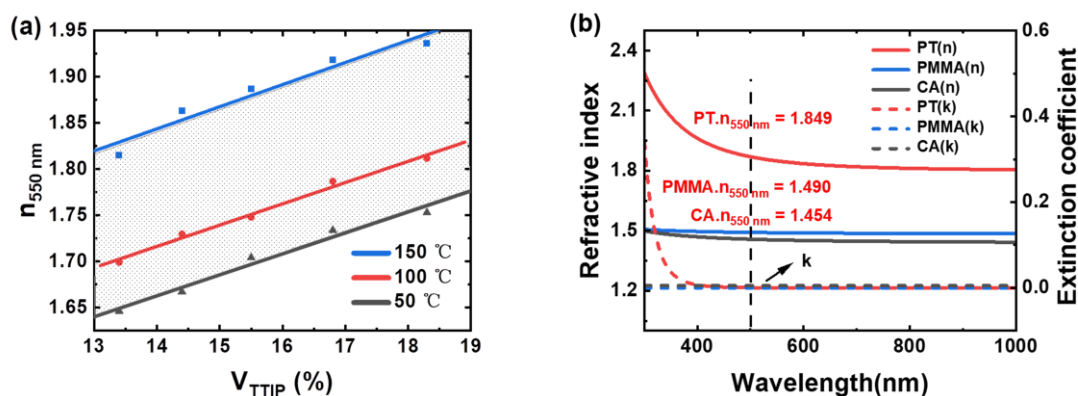

Figure S3 (a) Refractive index plots of different ratios of the hybrid material PT at different temperatures. (b) Ellipsometry measurement of refractive index and extinction coefficient of the hybrid material PT (14.4%) and polymer materials CA and PMMA, both prepared on silicon wafers. The refractive index was fitted using the Cauchy model with three Cauchy coefficients of 1.798,  $3.14 \times 10^3$ , and  $3.72 \times 10^9$ , respectively.

Table S2 Molar ratio of the materials in the hybrid material PT (14.4%) when 1 g of PVA was used.

| Materials   | TTIP | HAcAc | AcOH |
|-------------|------|-------|------|
| Molar ratio | 1    | 11    | 5.13 |

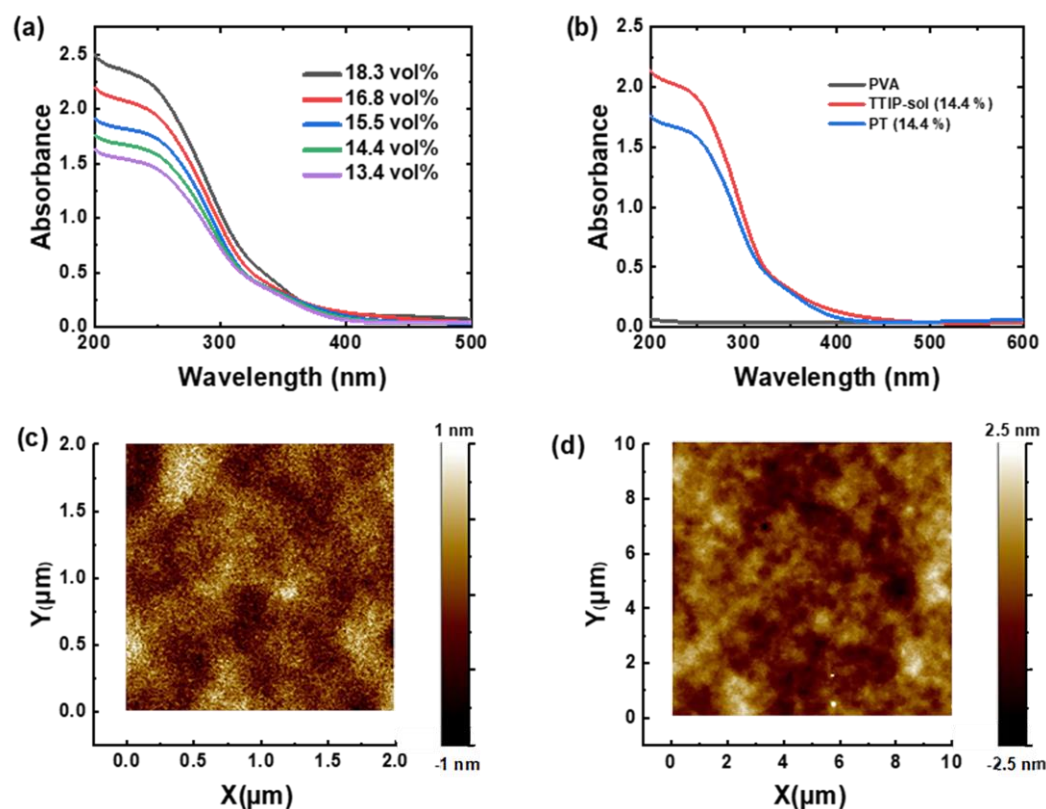

Figure S4 (a) Absorbance of PT films prepared on quartz substrates with different ratios of hybrid materials measured using UV spectrophotometer; (b) Absorbance of PVA, TTIP-sol, and PT film materials prepared on quartz substrates. (c) AFM of PT (14.4 %) films measured at a size of  $2\text{ }\mu\text{m} \times 2\text{ }\mu\text{m}$ . (d) AFM of PT (14.4 %) films measured at a large size of  $10\text{ }\mu\text{m} \times 10\text{ }\mu\text{m}$ . The annealing temperature was set at 150°C.

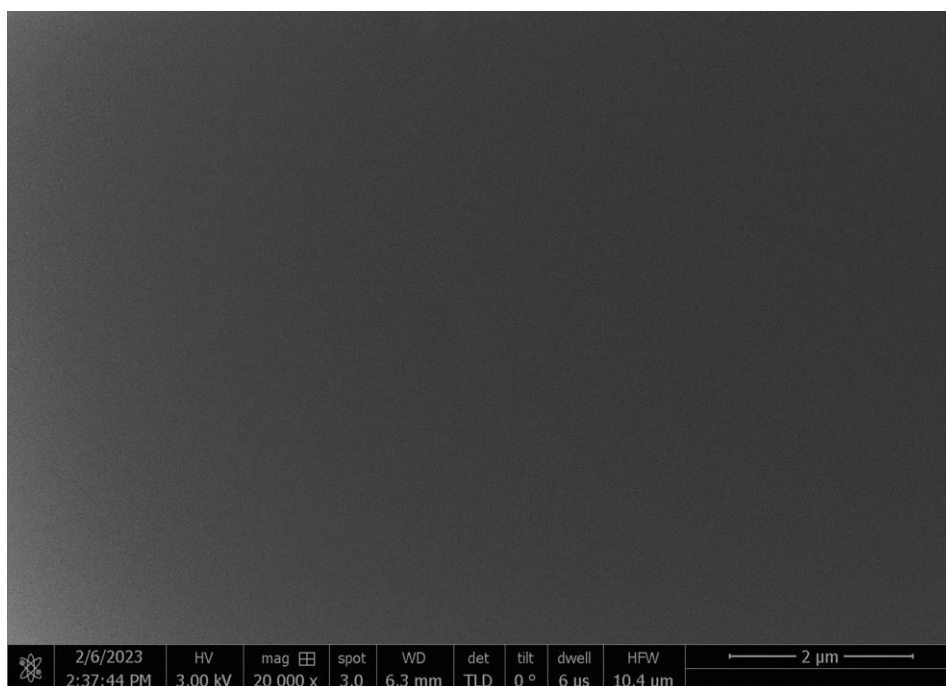

Figure S5 Scanning electron microscope (SEM) morphology of hybrid material PT (14.4%) films.

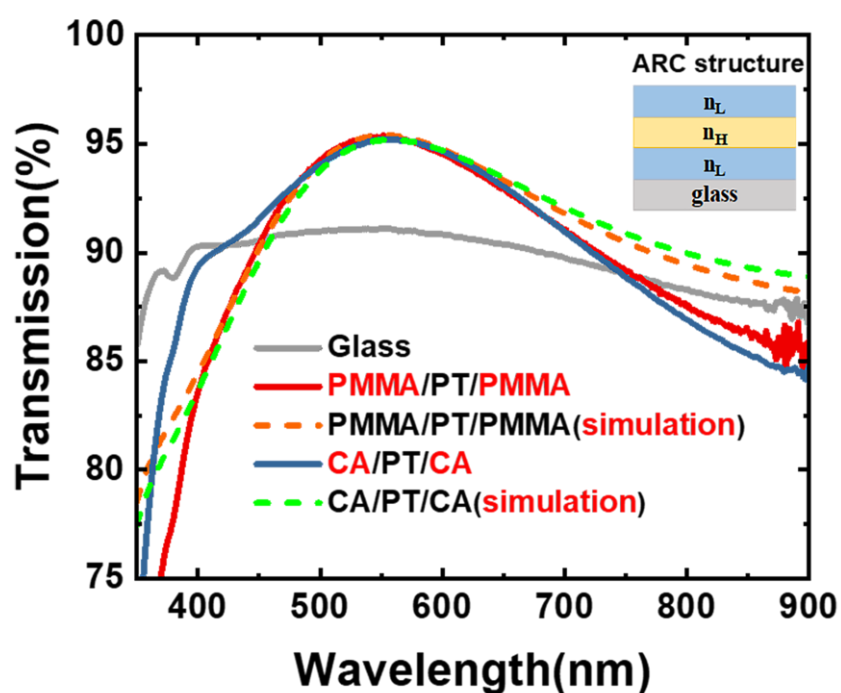

Figure S6 (a) Transmission spectra of triple-layer films with CA/PT/CA structure and PMMA/PT/PMMA structure.  $n_H$ : high refractive index hybrid material PT;  $n_L$ : low refractive index material CA and PMMA.

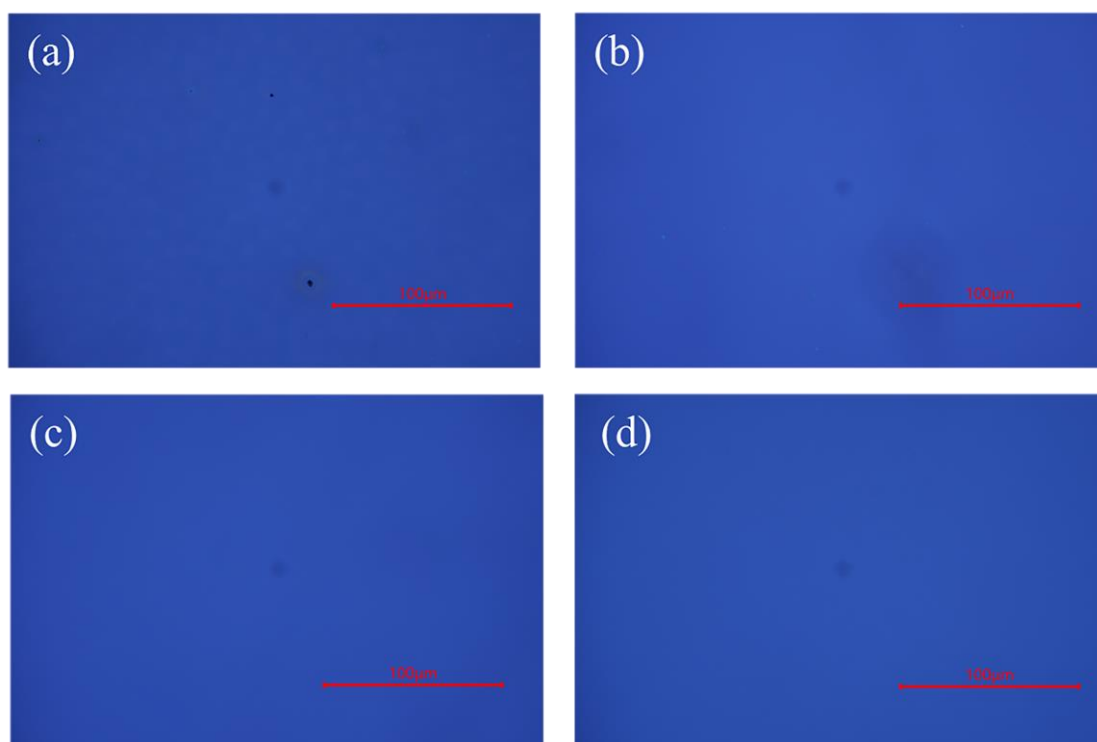

Fig. S7 Micrographs of the triple-layer structure of the antireflective films taken by an Olympus microscope. The antireflective films prepared by CA using acetonitrile (a), acetone (b), and DMAc (c) respectively as solvent to construct the CA/PT/CA structure. (d) PMMA/PT/PMMA film stacks.

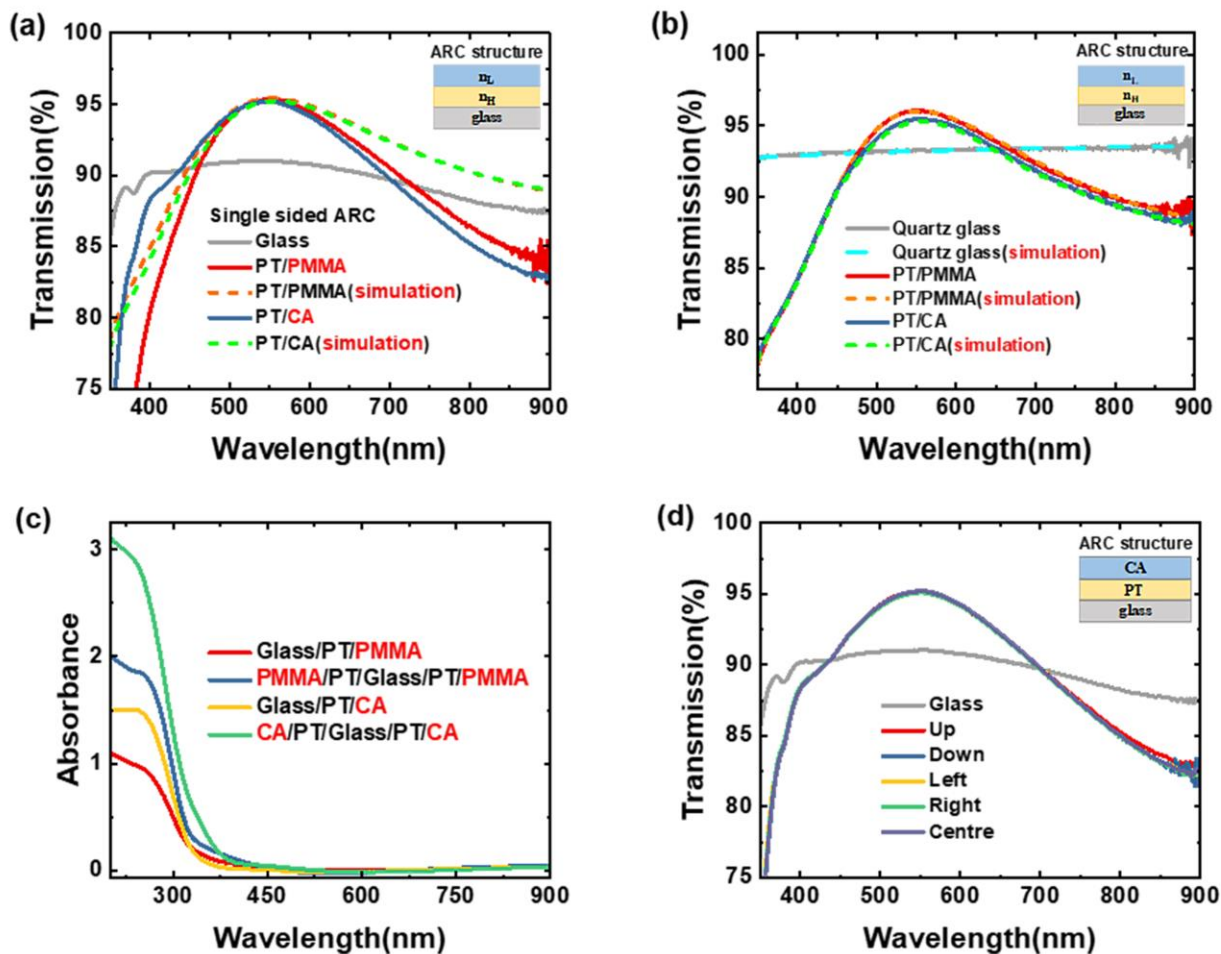

Figure S8 (a) Transmittance spectra of single-sided antireflective films of large-area PT/CA structure and PT/PMMA structure; (b) Transmission spectra of bilayer films with PT/CA structure and PT/PMMA structure. The refractive index and extinction coefficient of the simulated quartz substrate was set to 1.551 and  $1.1 \times 10^{-7}$ , respectively. (c) Absorption of different types of the single-sided and double-sided antireflective films. (d) Transmission spectra of the large-area and single-sided PT/CA antireflective films measured at five different positions: top, bottom, left, right, and center, respectively.  $n_H$ : high refractive index hybrid material PT.  $n_L$ : low refractive index material CA. The device structure of inverted perovskite solar cells is ITO/PTAA/Perovskite/PCBM/BCP/Ag [29]. The area of the active layer was  $0.04 \text{ cm}^2$ .

Table S3 Performance parameters of perovskite solar cell modules before and after preparation of PT/CA antireflective films for the cover glass (Device area: 0.04 cm<sup>2</sup>)

| Perovskite solar cells             | J <sub>sc</sub><br>(mA/cm <sup>2</sup> ) | J <sub>sc</sub> (EQE)<br>(mA/cm <sup>2</sup> ) <sup>a</sup> | FF (%) | V <sub>oc</sub> (V) | PCE (%) |
|------------------------------------|------------------------------------------|-------------------------------------------------------------|--------|---------------------|---------|
| With cover glass                   | 21.32                                    | 18.91                                                       | 79.91  | 0.97                | 16.57   |
| With single ARC<br>(PT/PMMA)       | 21.48                                    | 19.73                                                       | 79.57  | 0.99                | 16.95   |
| With double sided<br>ARC (PT/PMMA) | 21.73                                    | 19.95                                                       | 79.22  | 0.99                | 17.11   |

<sup>a</sup>Current density calculated from the EQE. The device structure of inverted perovskite solar cell is ITO/PTAA/Perovskite/PCBM/BCP/Ag [29]. The area of the active layer was 0.04 cm<sup>2</sup>.

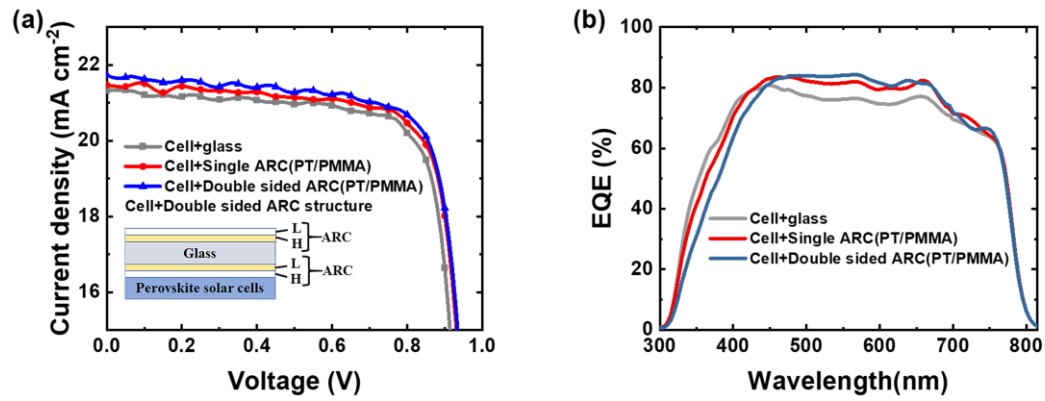

Figure S9 Performance parameters of perovskite solar cell modules with PT/PMMA structured single-sided and double-sided antireflective films prepared on cover glass. (a) J-V curves; (b) EQE plots. H: high refractive index hybrid material PT. L: low refractive index material PMMA.
